# Supplementary material for: Gut microbiota changes are detected in asymptomatic very young children with SARS-CoV-2 infection
Source: HighWire-hosted journal article supplement (doi:10.1136/gutjnl-2021-326599), 2022-02-08

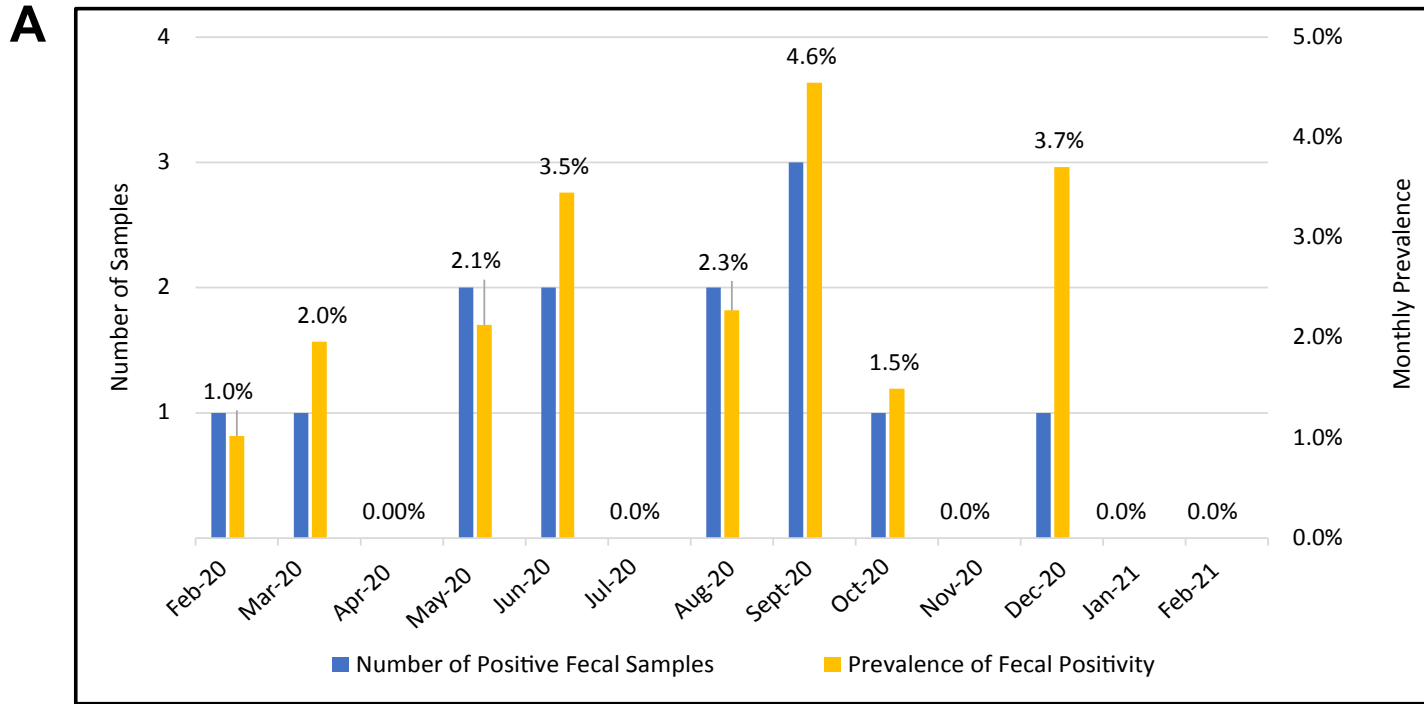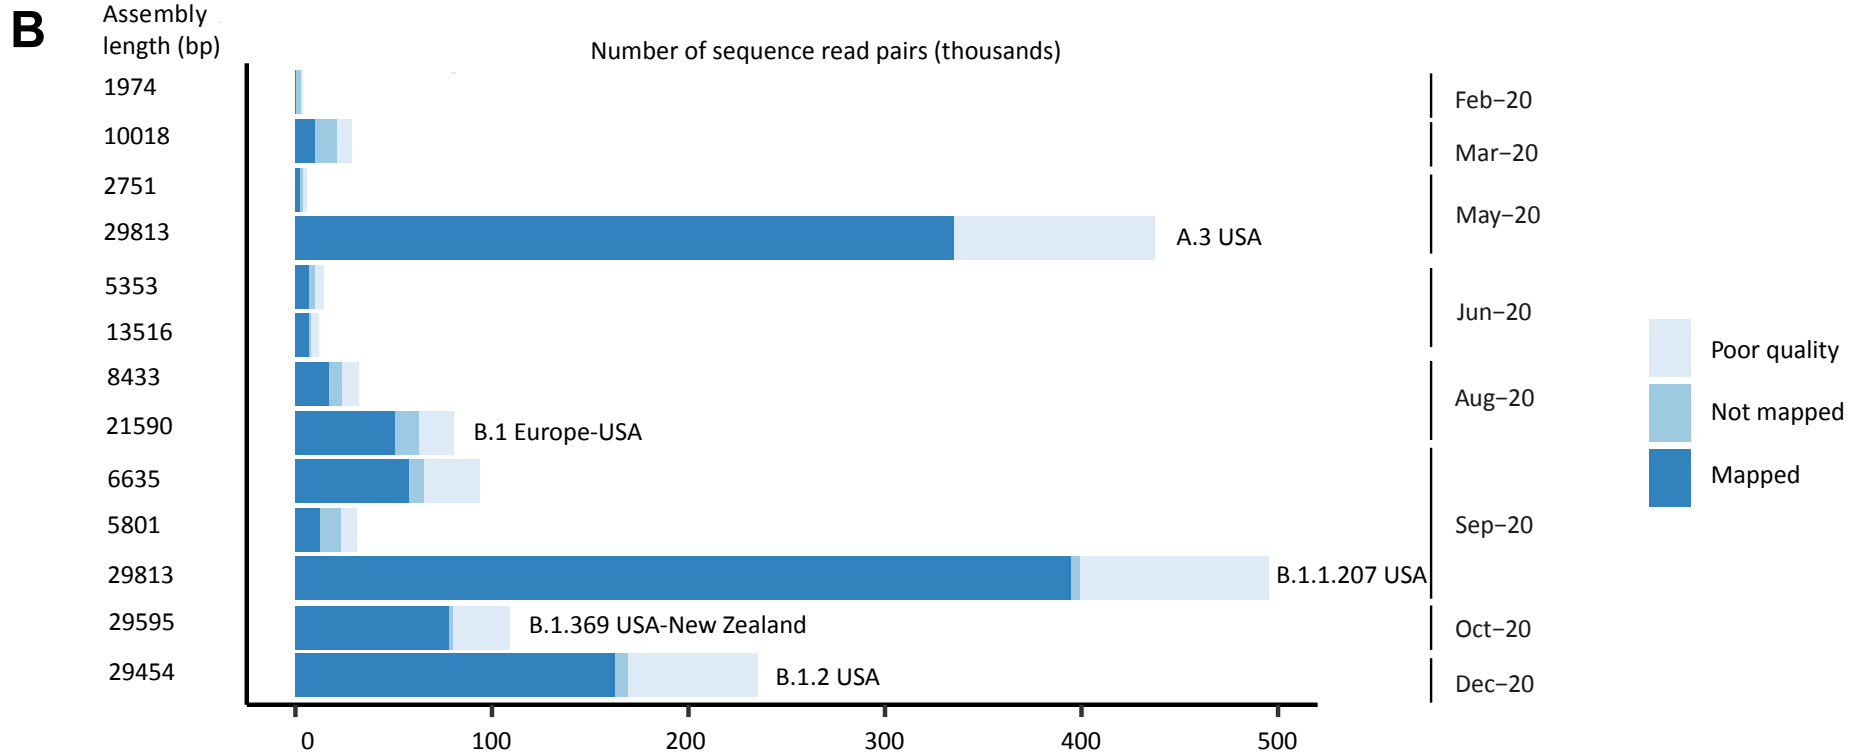

Supplement: gutjnl-2021-326599supp001_data_supplement.pdf [file gutjnl-2021-326599supp001_data_supplement.pdf]
